# Supplementary material for: Dehydrocrenatidine Inhibits Voltage-Gated Sodium Channels and Ameliorates Mechanic Allodia in a Rat Model of Neuropathic Pain
Source: MDPI journal article supplement (doi:10.3390/toxins11040229), 2019-04-18
Supplement: s1 [file s1]

# Supplementary Materials: Dehydrocrenatidine Inhibits Voltage-Gated Sodium Channels and Ameliorates Mechanic Allodia in a Rat Model of Neuropathic Pain

Fang Zhao, Qinglian Tang, Jian Xu, Shuangyan Wang, Shaoheng Li, Xiaohan Zou \* and Zhengyu Cao \*

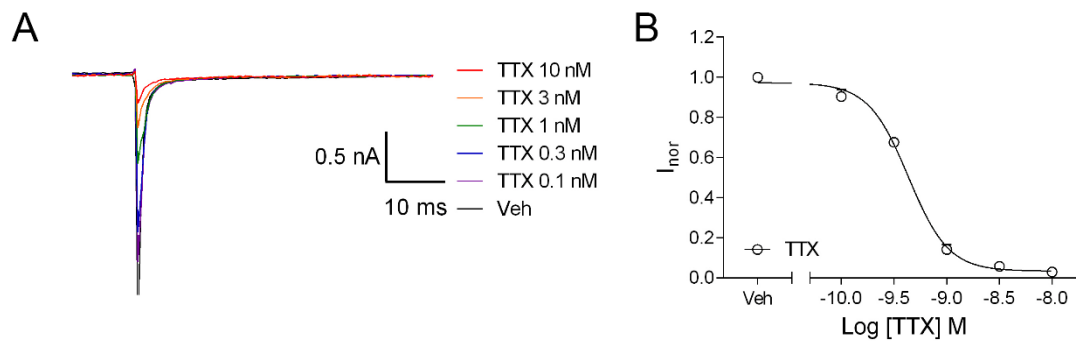

**Figure S1.** TTX suppressed TTX-S Na<sup>+</sup> currents in medium- and large-diameter DRG neurons. **(A)** Representative traces for TTX suppressing TTX-S Na<sup>+</sup> currents. **(B)** Concentration-response curve of TTX suppressed TTX-S Na<sup>+</sup> currents. Sodium currents were evoked by a 50 ms depolarization pulse to 0 mV from a holding potential of -100 mV. Each data point represents mean  $\pm$  SEM ( $n = 5$ ).
